# Supplementary material for: Upregulation of Orai Channels Contributes to Aging-Related Vascular Alterations in Rat Coronary Arteries
Source: MDPI journal article supplement (doi:10.3390/ijms241713402), 2023-08-29
Supplement: s1 [file s1]

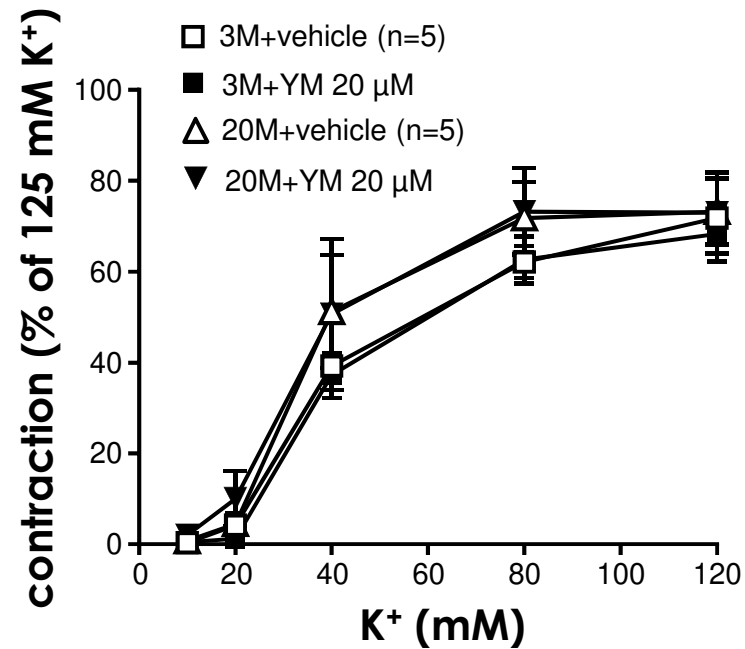

**Supplementary Figure S1. STIM/Orai inhibition did not modify K<sup>+</sup>-induced contractions in rat coronary arteries.** Effects of the treatment with vehicle (0.2% DMSO) or the STIM/Orai inhibitor, YM-58483 (YM, 20 μM) on KCl (10 to 120 mM)-induced contractions in coronary arteries from young (3-months old, 3M) and aged (20-months old, 20M) rats. Data are expressed as mean±S.E.M. of the percentage of 125 mM K<sup>+</sup>-induced contraction. n indicates the number of animals used for experiments. No significant differences were obtained by two-factors ANOVA.

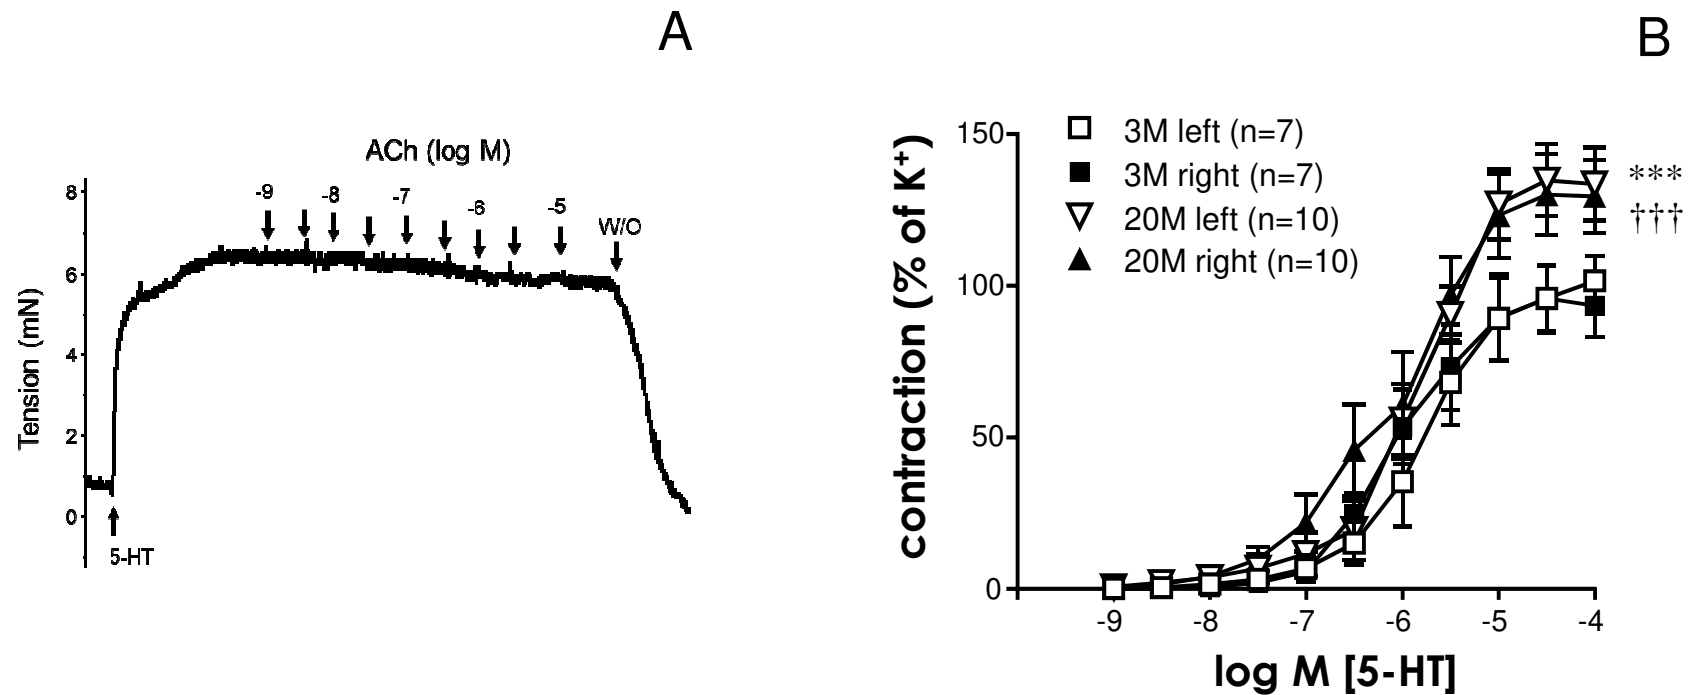

**Supplementary Figure S2. Endothelium is required for acetylcholine (ACh)-induced relaxation of rat coronary artery (CA) while left and right coronary arteries display similar contractility in young and aged rats.** Panel A shows a representative tracing demonstrating the lack of relaxation to ACh (1 nM to 10  $\mu$ M) in a CA segment from a young (3-months old, 3M) rat contracted with serotonin (5-HT) and previously denuded of endothelium by repeatedly passing a human hair through the lumen of the arterial segment. W/O indicates washout. Panel B shows contractile responses induced by 5-HT in left and right CA from young (3M) and aged (20-months old, 20M) rats. Data are expressed as mean  $\pm$  S.E.M. of the percentage of 125 mM  $K^+$ -induced contraction. n indicates the number of animals used for experiments. No significant differences were obtained by two-factors ANOVA between left and right rat CA while aging-related hypercontractility were maintained when comparing arteries from the same side of the heart. \*\*\* p < 0.001 vs. respective responses in left CA from 3M rats, ††† p < 0.001 vs. respective responses in right CA from 3M rats.

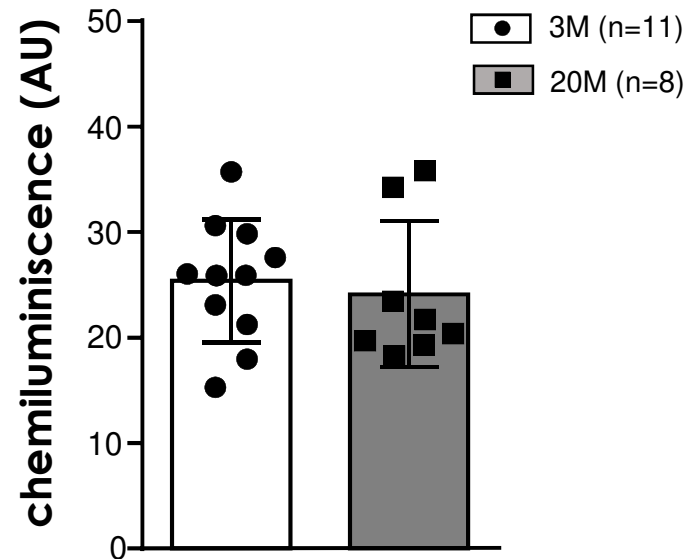

**Supplementary Figure S3. Aging did not significantly modify  $\alpha$ -actin expression in rat coronary arteries.** Quantification of band densities obtained in immunoblot assays in rat coronary artery homogenates from young (3-months old, 3M) and aged (20-months old, 20M) rats. Data are expressed as mean $\pm$ SD as well as individual data of band intensity in arbitrary units (AU) of chemiluminescence. n indicates the number of animals used for experiments. No significant differences were obtained by Mann-Whitney test.
